# Supplementary material
Source: publisher site journal article supplement (https://www.dovepress.com/article/594131)
Supplement: Supplementary file 1 [file 594131%20Revised%20Supplementary%20Table%20S1.docx]

**Supplementary Table S1. Inter-rater reliability of CT scoring between two radiologists**

| Parameter | Rater 1, mean ± SD | Rater 2, mean ± SD | Exact agreement, n (%) | Discrepant cases, n (%) | Maximum difference | ICC(2,1) |
| --- | --- | --- | --- | --- | --- | --- |
| Total score | 10.75 ± 4.99 | 10.73 ± 4.94 | 456 (94.0) | 29 (6.0) | 3 | 0.997 |
| Right upper lobe | 2.18 ± 2.09 | 2.18 ± 2.09 | 485 (100.0) | 0 (0.0) | 0 | 1.000 |
| Right middle lobe | 2.26 ± 1.98 | 2.25 ± 1.97 | 474 (97.7) | 11 (2.3) | 2 | 0.995 |
| Right lower lobe | 2.12 ± 2.10 | 2.11 ± 2.06 | 474 (97.7) | 11 (2.3) | 3 | 0.994 |
| Left upper lobe | 1.72 ± 1.87 | 1.72 ± 1.85 | 480 (99.0) | 5 (1.0) | 2 | 0.997 |
| Left lower lobe | 2.48 ± 2.22 | 2.48 ± 2.22 | 483 (99.6) | 2 (0.4) | 2 | 0.999 |

*Abbreviations: RUL, right upper lobe; RML, right middle lobe; RLL, right lower lobe; LUL, left upper lobe; LLL, left lower lobe.*

*ICC(2,1) indicates a two-way random-effects, absolute-agreement, single-measure intraclass correlation coefficient.*

*For the total score, ICC(2,1)=0.997 (95% CI 0.997–0.998).*
